# Supplementary material
Source: PubMed Central journal article supplement (PMC3982880)

FIGURE S1

A

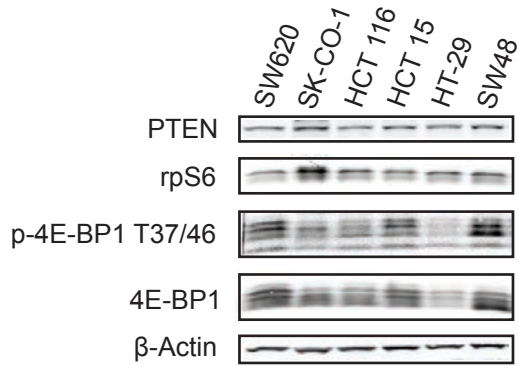

B

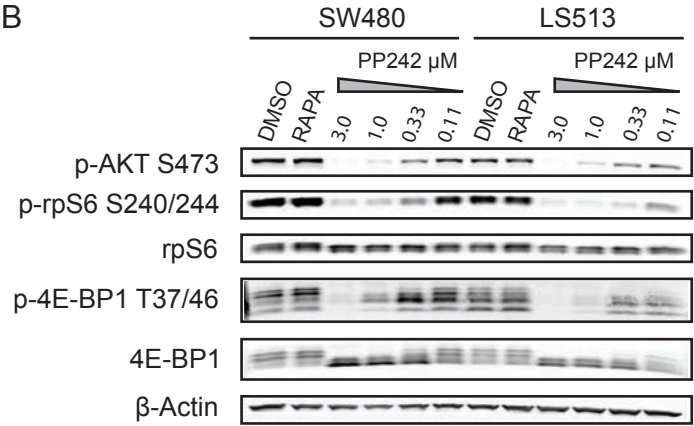

C

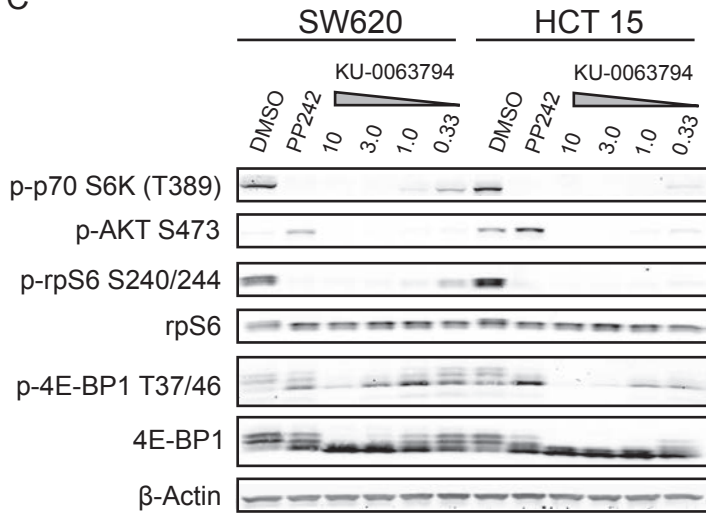

D

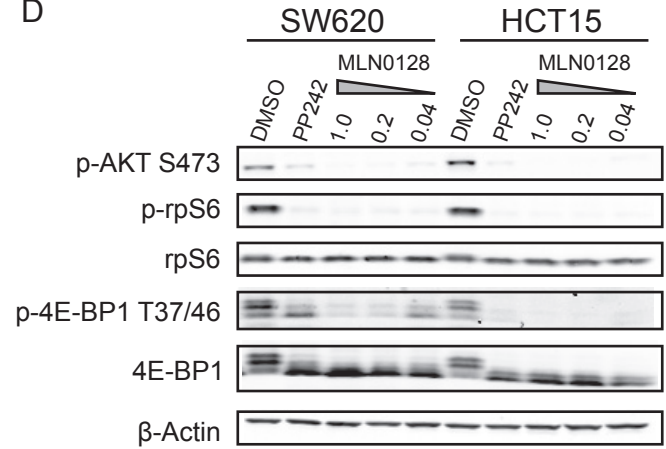

FIGURE S2

A *HCT 15 Cells*

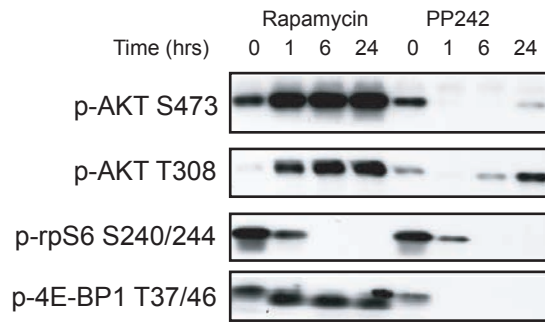

B

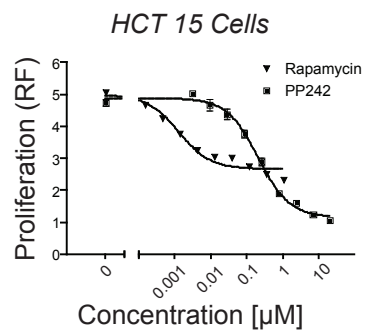

FIGURE S3

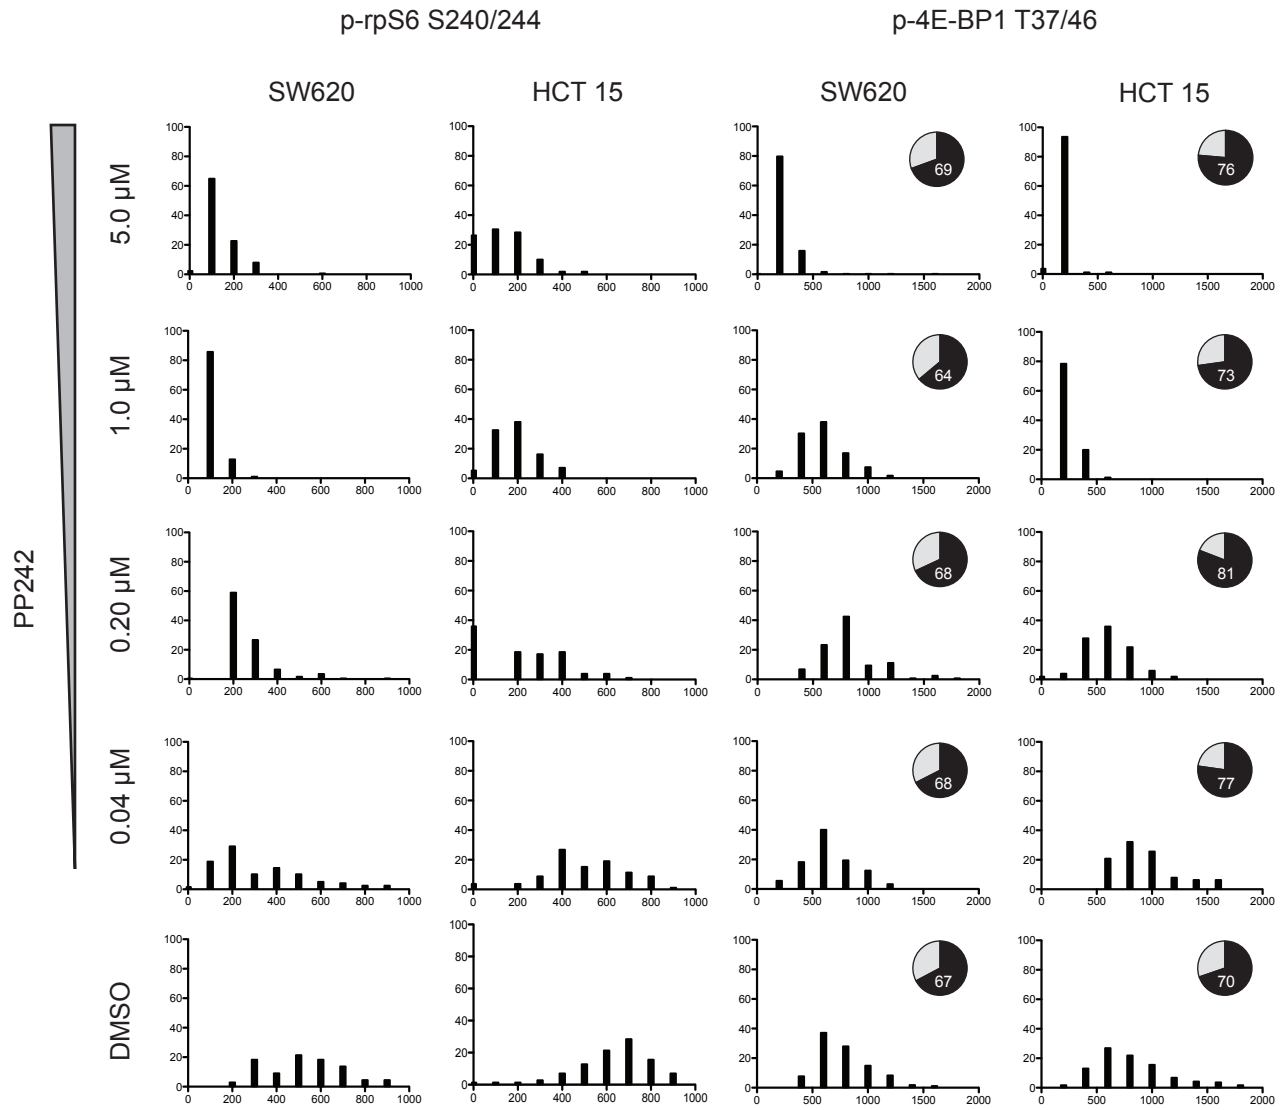

FIGURE S4

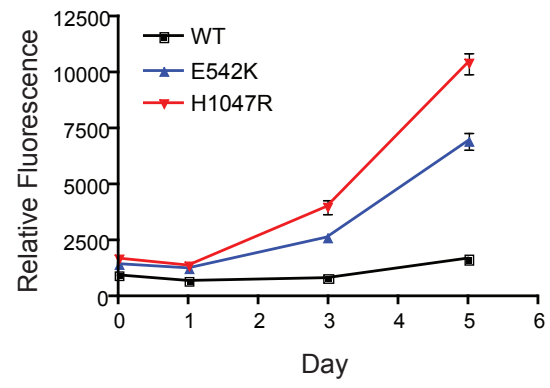



FIGURE S5

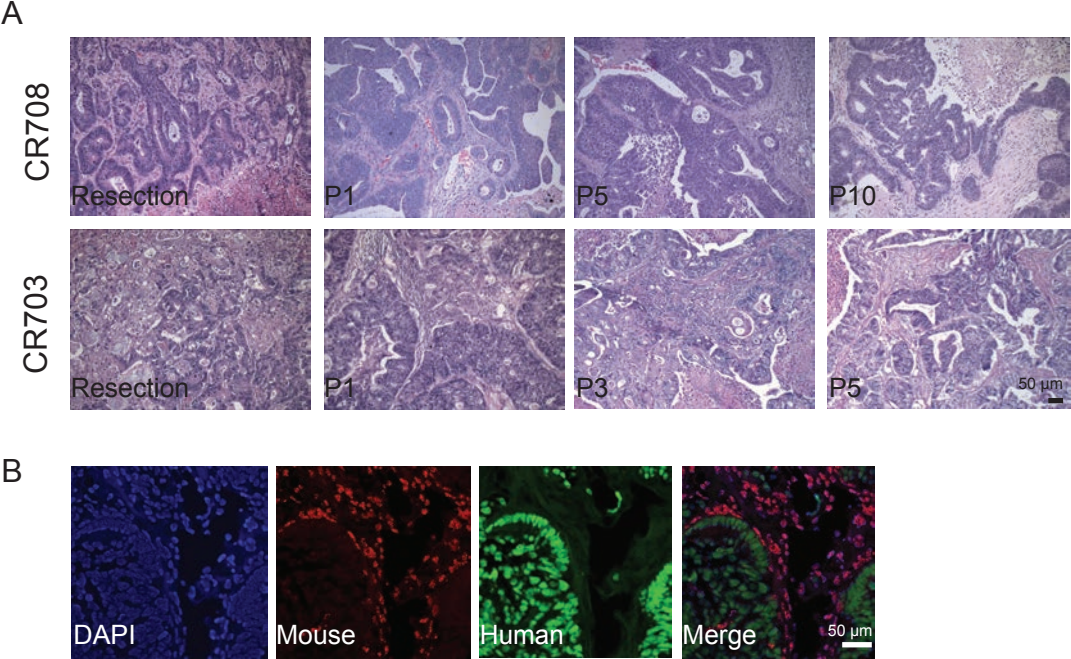

FIGURE S6

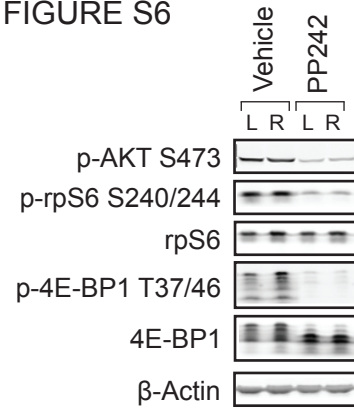

FIGURE S7

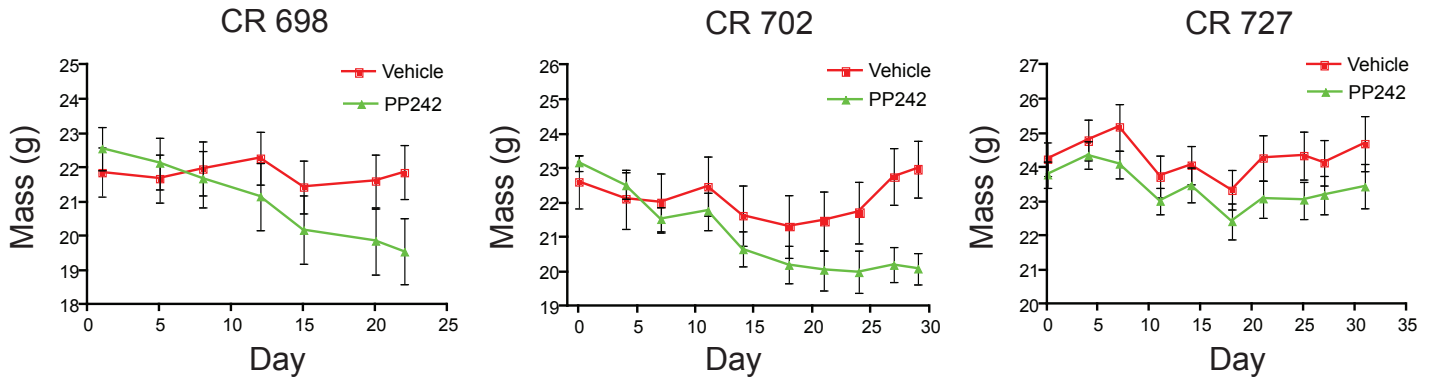

FIGURE S8

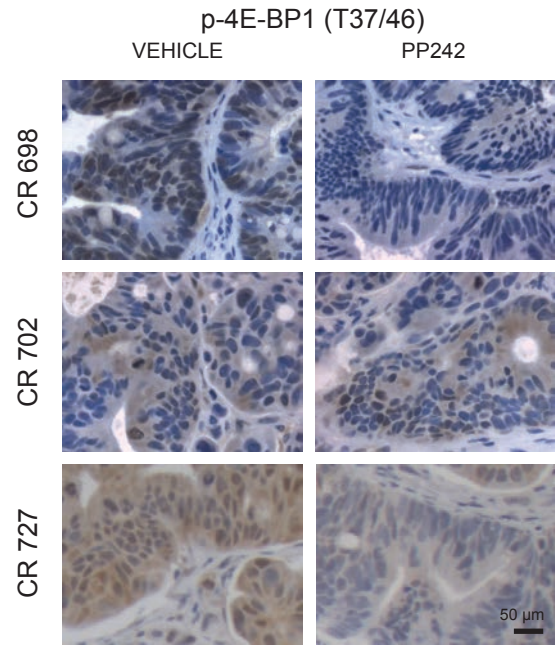

Supplement: NIHMS550085-supplement-2.pdf [file NIHMS550085-supplement-2.pdf]
